# Supplementary material for: Fabrication of Salvinia-inspired surfaces for hydrodynamic drag reduction by capillary-force-induced clustering
Source: PubMed Central journal article supplement (PMC9440115; doi:10.1038/s41467-022-32919-4), 2022-09-02
Supplement: 41467_2022_32919_MOESM1_ESM.pdf [file 41467_2022_32919_MOESM1_ESM.pdf]

## Supplementary Information

### **Fabrication of *Salvinia*-inspired surfaces for hydrodynamic drag reduction by capillary-force-induced clustering**

*Minsu Kim<sup>1</sup>, Seunghoon Yoo<sup>1</sup>, Hoon Eui Jeong<sup>2</sup> and Moon Kyu Kwak<sup>1\*</sup>*

<sup>1</sup>Department of Mechanical Engineering, Kyungpook National University, Daegu 41566, Republic of Korea

Prof. H. E. Jeong

<sup>2</sup>Department of Mechanical Engineering, Ulsan National Institute of Science and Technology (UNIST), Ulsan 44919, Republic of Korea

\*E-mail: mkkwak@knu.ac.kr

Supplementary Figures 1-7

Supplementary Table 1

Supplementary References

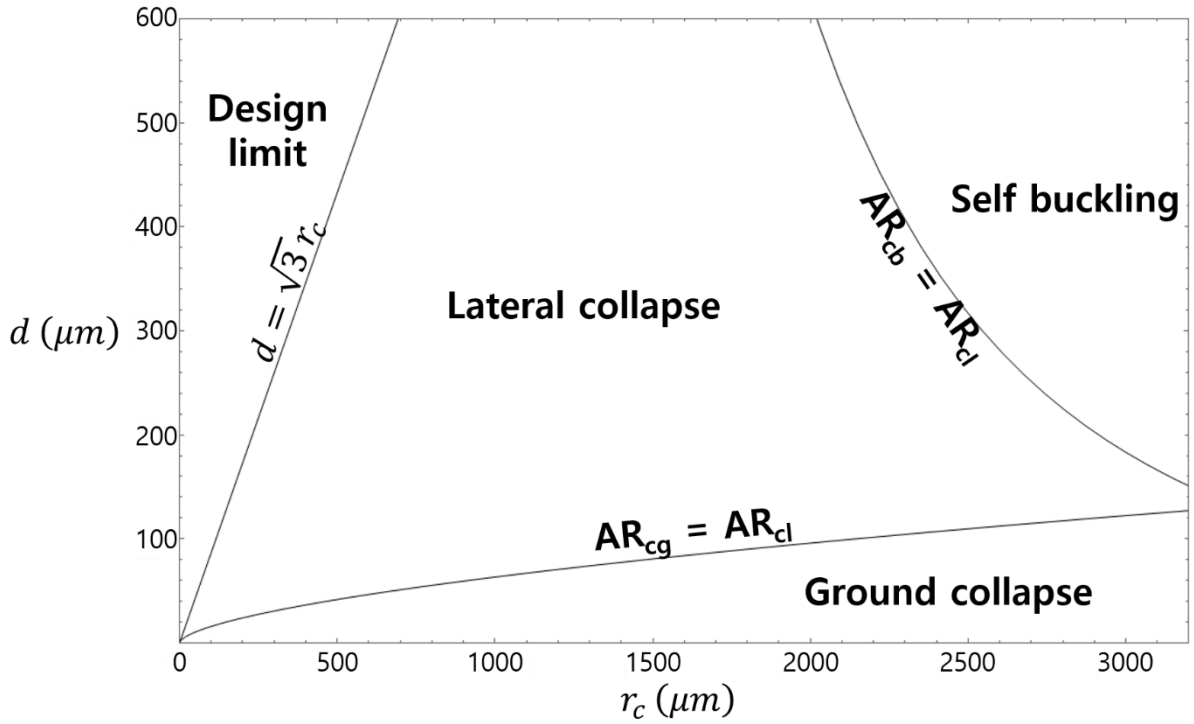

**Supplementary Fig. 1.**  
**Design limit and critical condition plots for each collapse type according to the center-to-center radius and pillar diameter.**

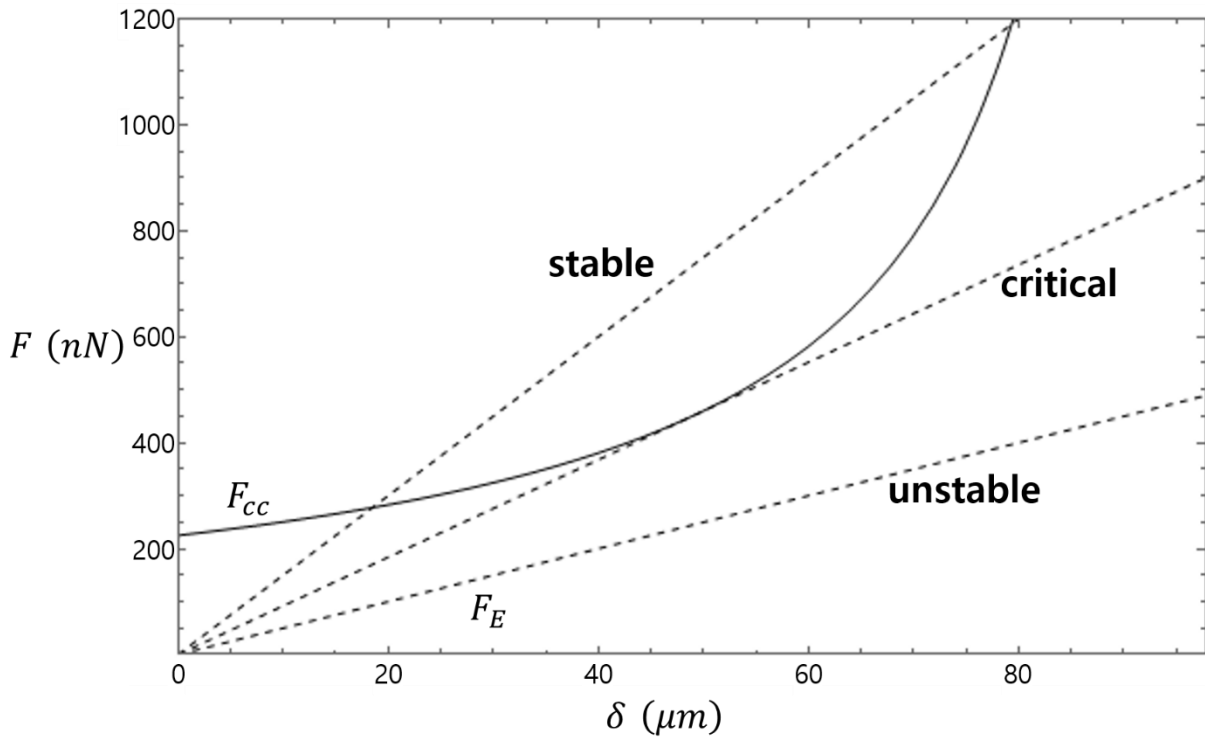

**Supplementary Fig. 2.**  
**Typical cases of capillary interaction force and elastic restoring force as a function of pillar deflection.**

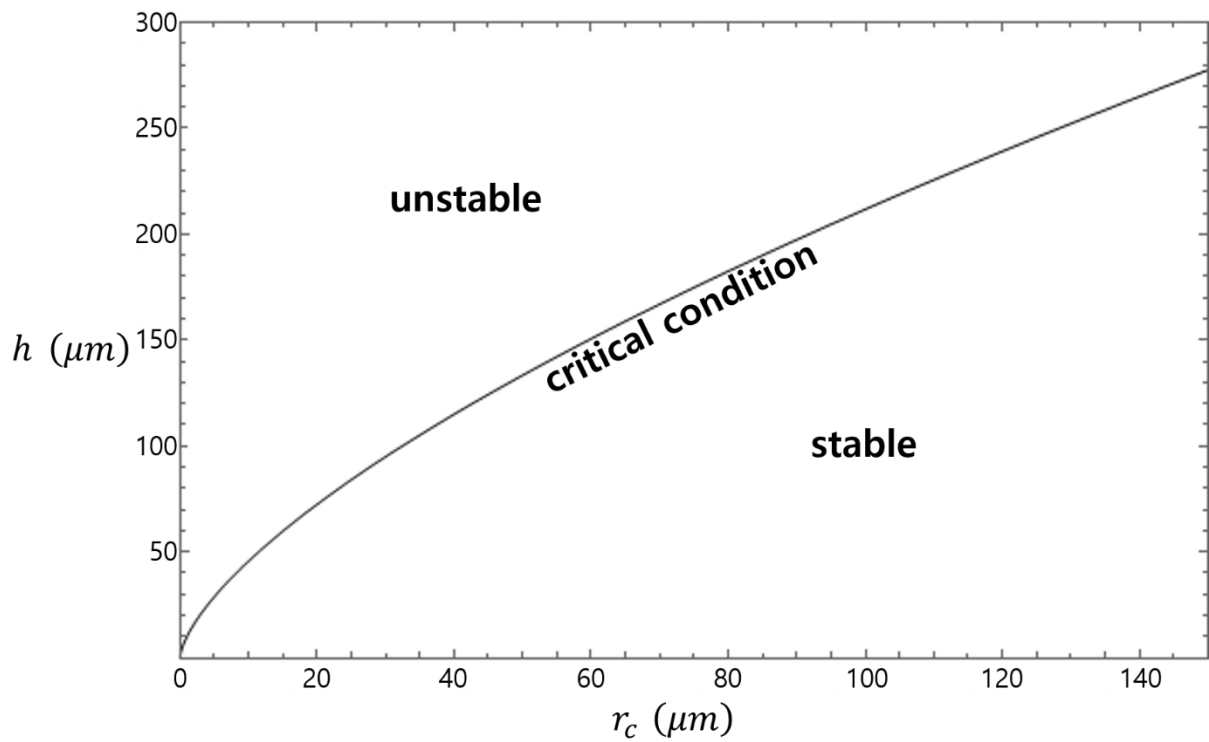

Supplementary Fig. 3.  
The critical condition for capillary-force-induced clustering.

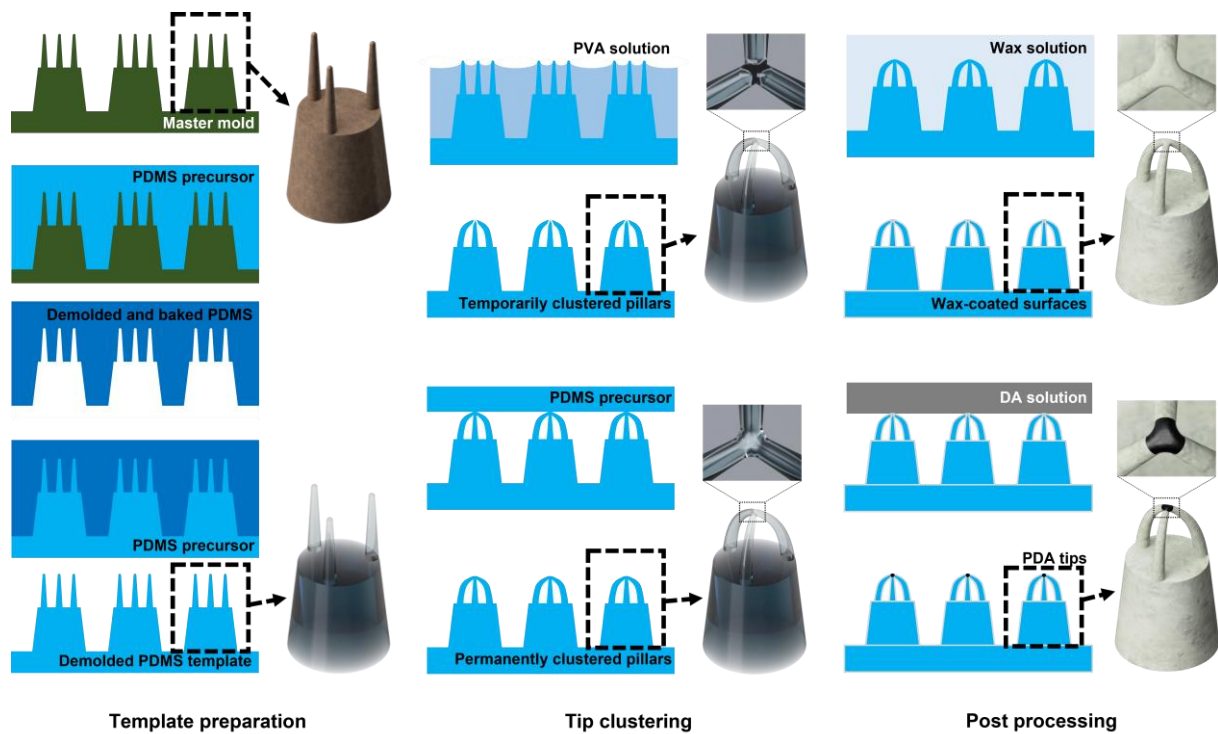

Supplementary Fig. 4.  
Schematic illustration of every phase of the fabrication processes.

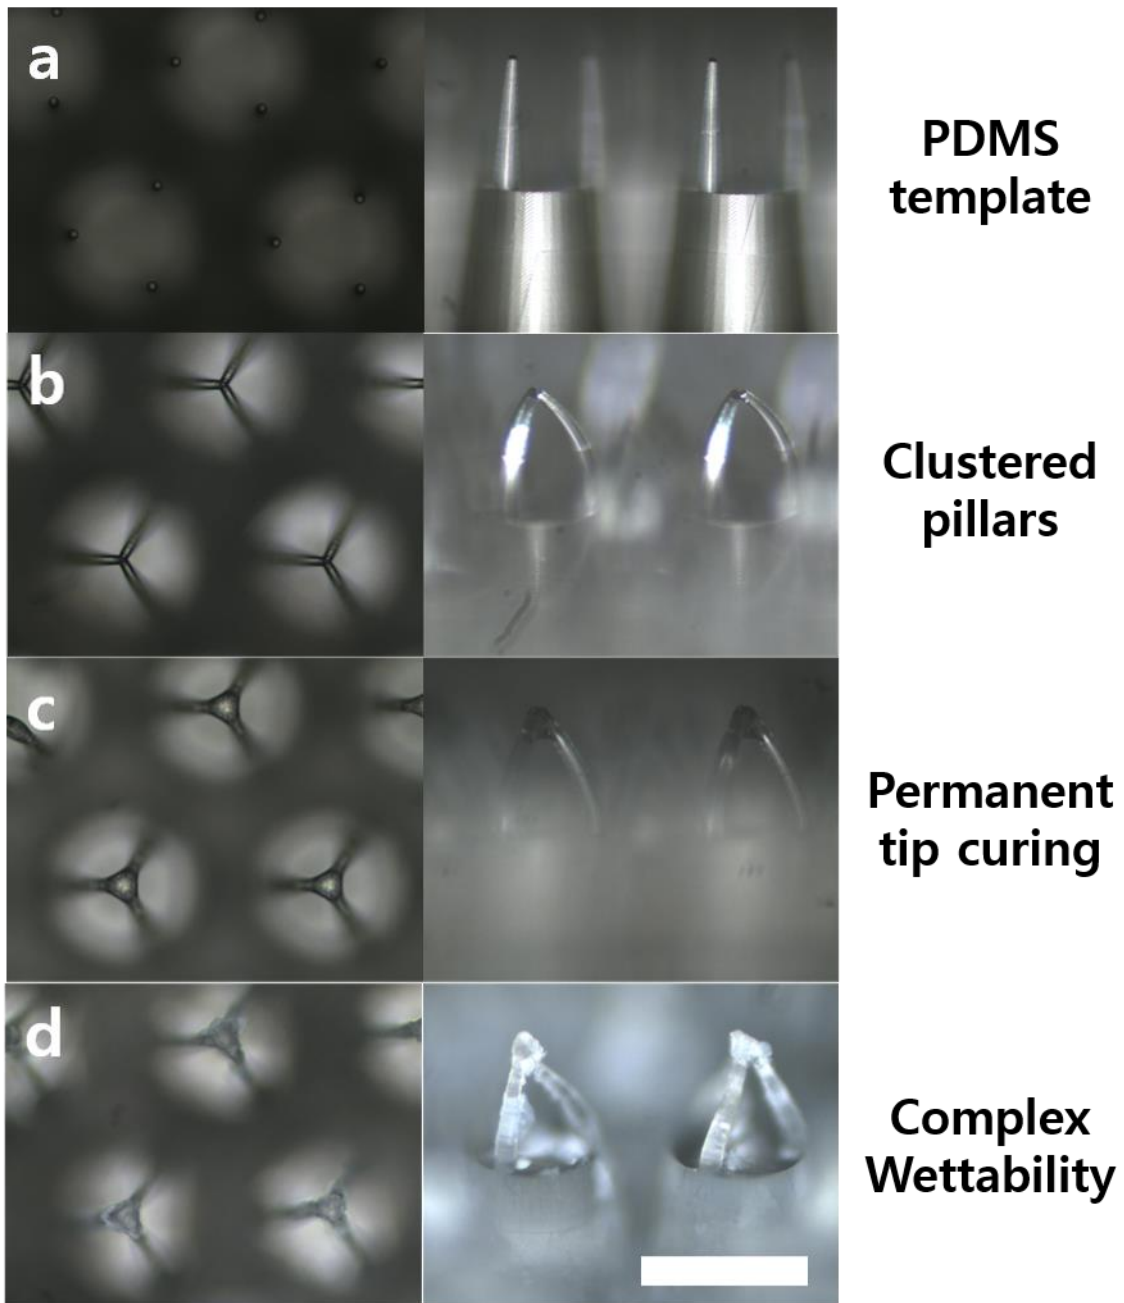

**Supplementary Fig. 5.** Microscopic images of PDMS hierarchical pillar array at each fabrication step. Scale bar represents 300  $\mu\text{m}$ .

CA  $174.9 \pm 3.2^\circ$

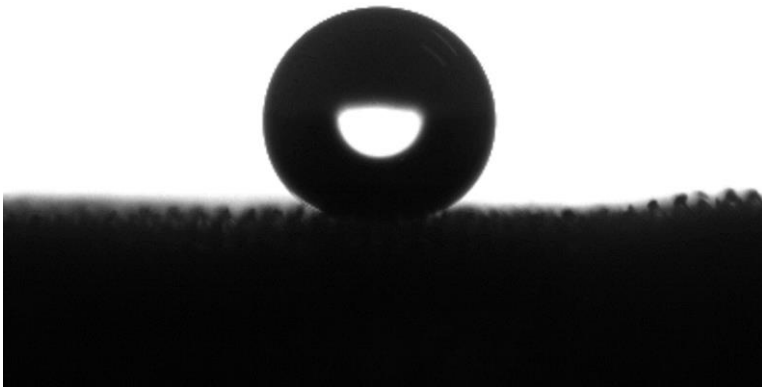

Supplementary Fig. 6.  
Water droplet on the fabricated *Salvinia*-inspired surfaces showing superhydrophobicity.

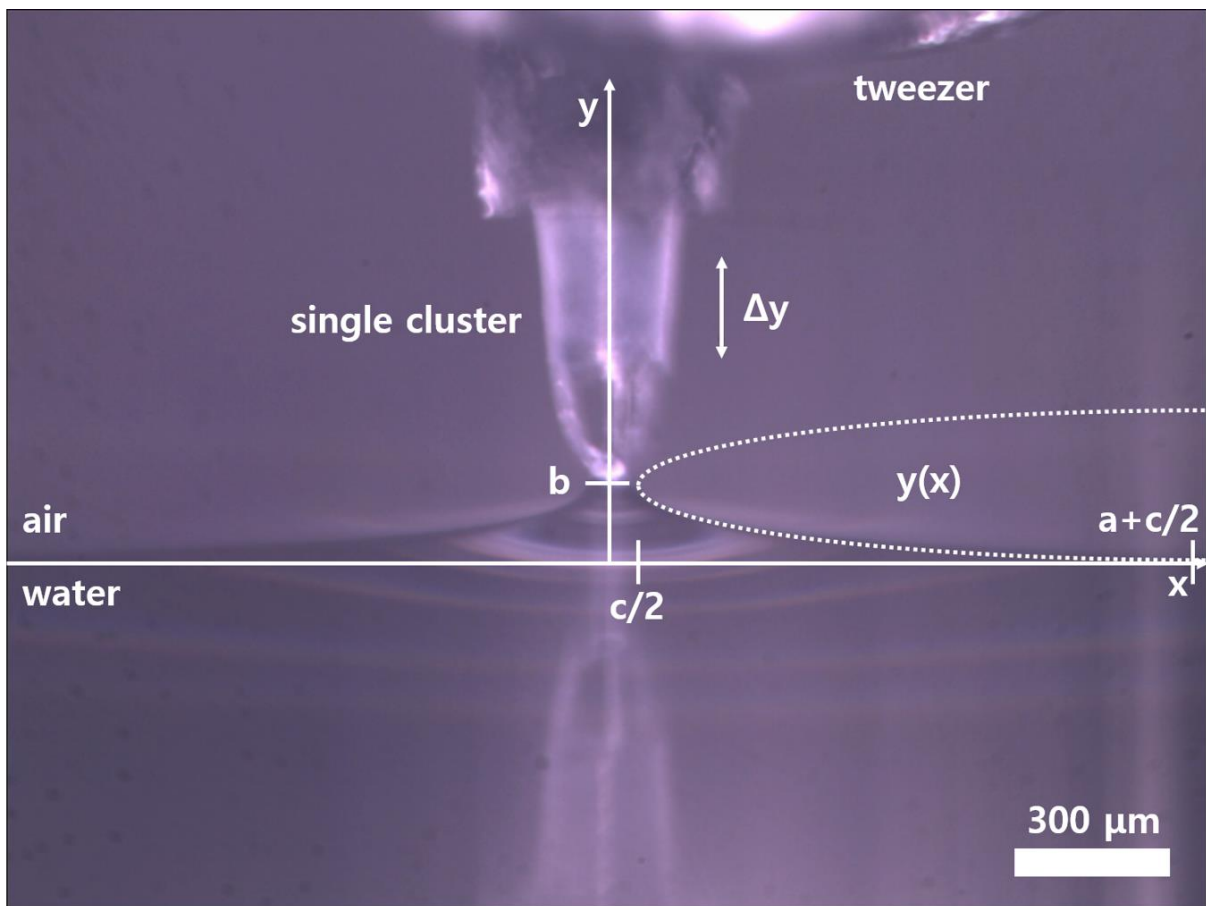

Supplementary Fig. 7.  
**Microscopic image of a single clustered structure pulling the water meniscus just before the snap-off.**  
Variables for the elliptical assumption are depicted to calculate the meniscus pulling force of the single clustered pillar.

The meniscus pull-off force of a single clustered structure can also be calculated by  $C\sigma \cos \theta$ , where  $C$  is the circumference of contact,  $\sigma$  is the surface tension of the liquid, and  $\theta$  is the local contact angle<sup>1-3</sup>. Although it is difficult to determine the exact local contact angle  $\theta$  from the image, with rough approximate measurements the pull-off force can be calculated as

in a range of 18.1 ~ 20.0  $\mu\text{N}$ , which is in a similar order with the value calculated from the elliptic approximation method following Gandyra et al. (Beilstein J. Nanotechnol., 2015)<sup>4</sup>.

**Supplementary Table 1.** Physical properties of PDMS(Sylgard 184)

| Physical property | Value | Unit              |
|-------------------|-------|-------------------|
| Elastic modulus   | 1.09  | Mpa               |
| Poisson's ratio   | 0.499 | -                 |
| Surface energy    | 19.8  | mJ/m <sup>2</sup> |
| Density           | 965   | Kg/m <sup>3</sup> |

#### Supplementary References

1. Dynes, P. J. & Kaelble, D. H. Surface energy analysis of carbon fibers and films. *J. Adhesion* **6**, 195–206 (1974).
2. Schultz, J., Cazeneuve, C., Shanahan, M. E. R. & Donnet, J. B. Fibre surface energy characterization. *J. Adhesion* **12**, 221–231 (1981).
3. Alimov, M. M. & Kornev, K. G. Meniscus on a shaped fibre: singularities and hodograph formulation. *Proc. R. Soc. A* **470**, 20140113 (2014).
4. Gandyra, D. *et al.* The capillary adhesion technique: a versatile method for determining the liquid adhesion force and sample stiffness. *Beilstein. J. Nanotechnol.* **6**, 11-18 (2015).
